# Supplementary material for: Lesion of the subiculum reduces the spread of amyloid beta pathology to interconnected brain regions in a mouse model of Alzheimer’s disease
Source: PubMed Central journal article supplement (PMC3932948; doi:10.1186/2051-5960-2-17), 2014-02-11

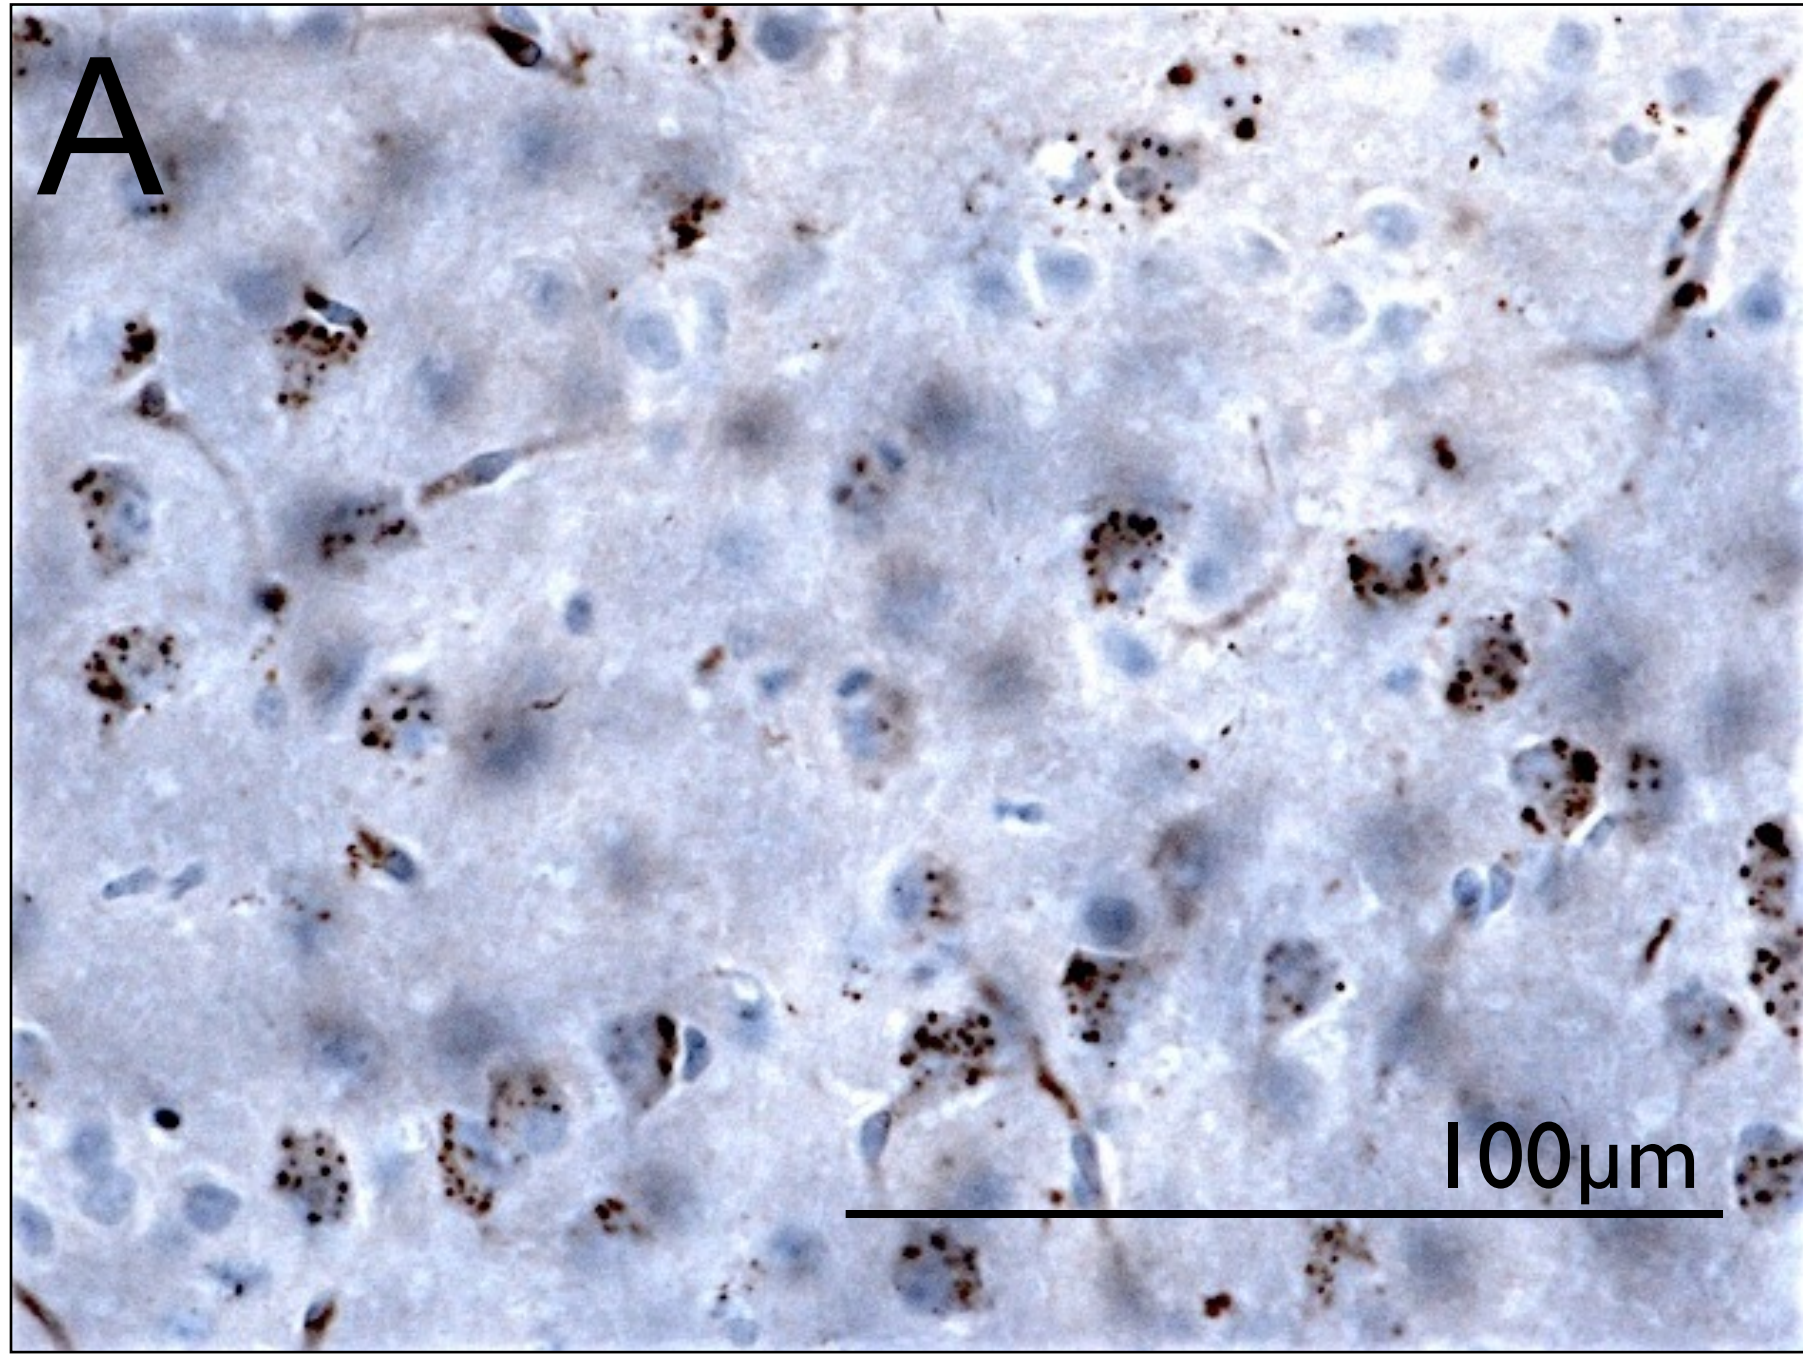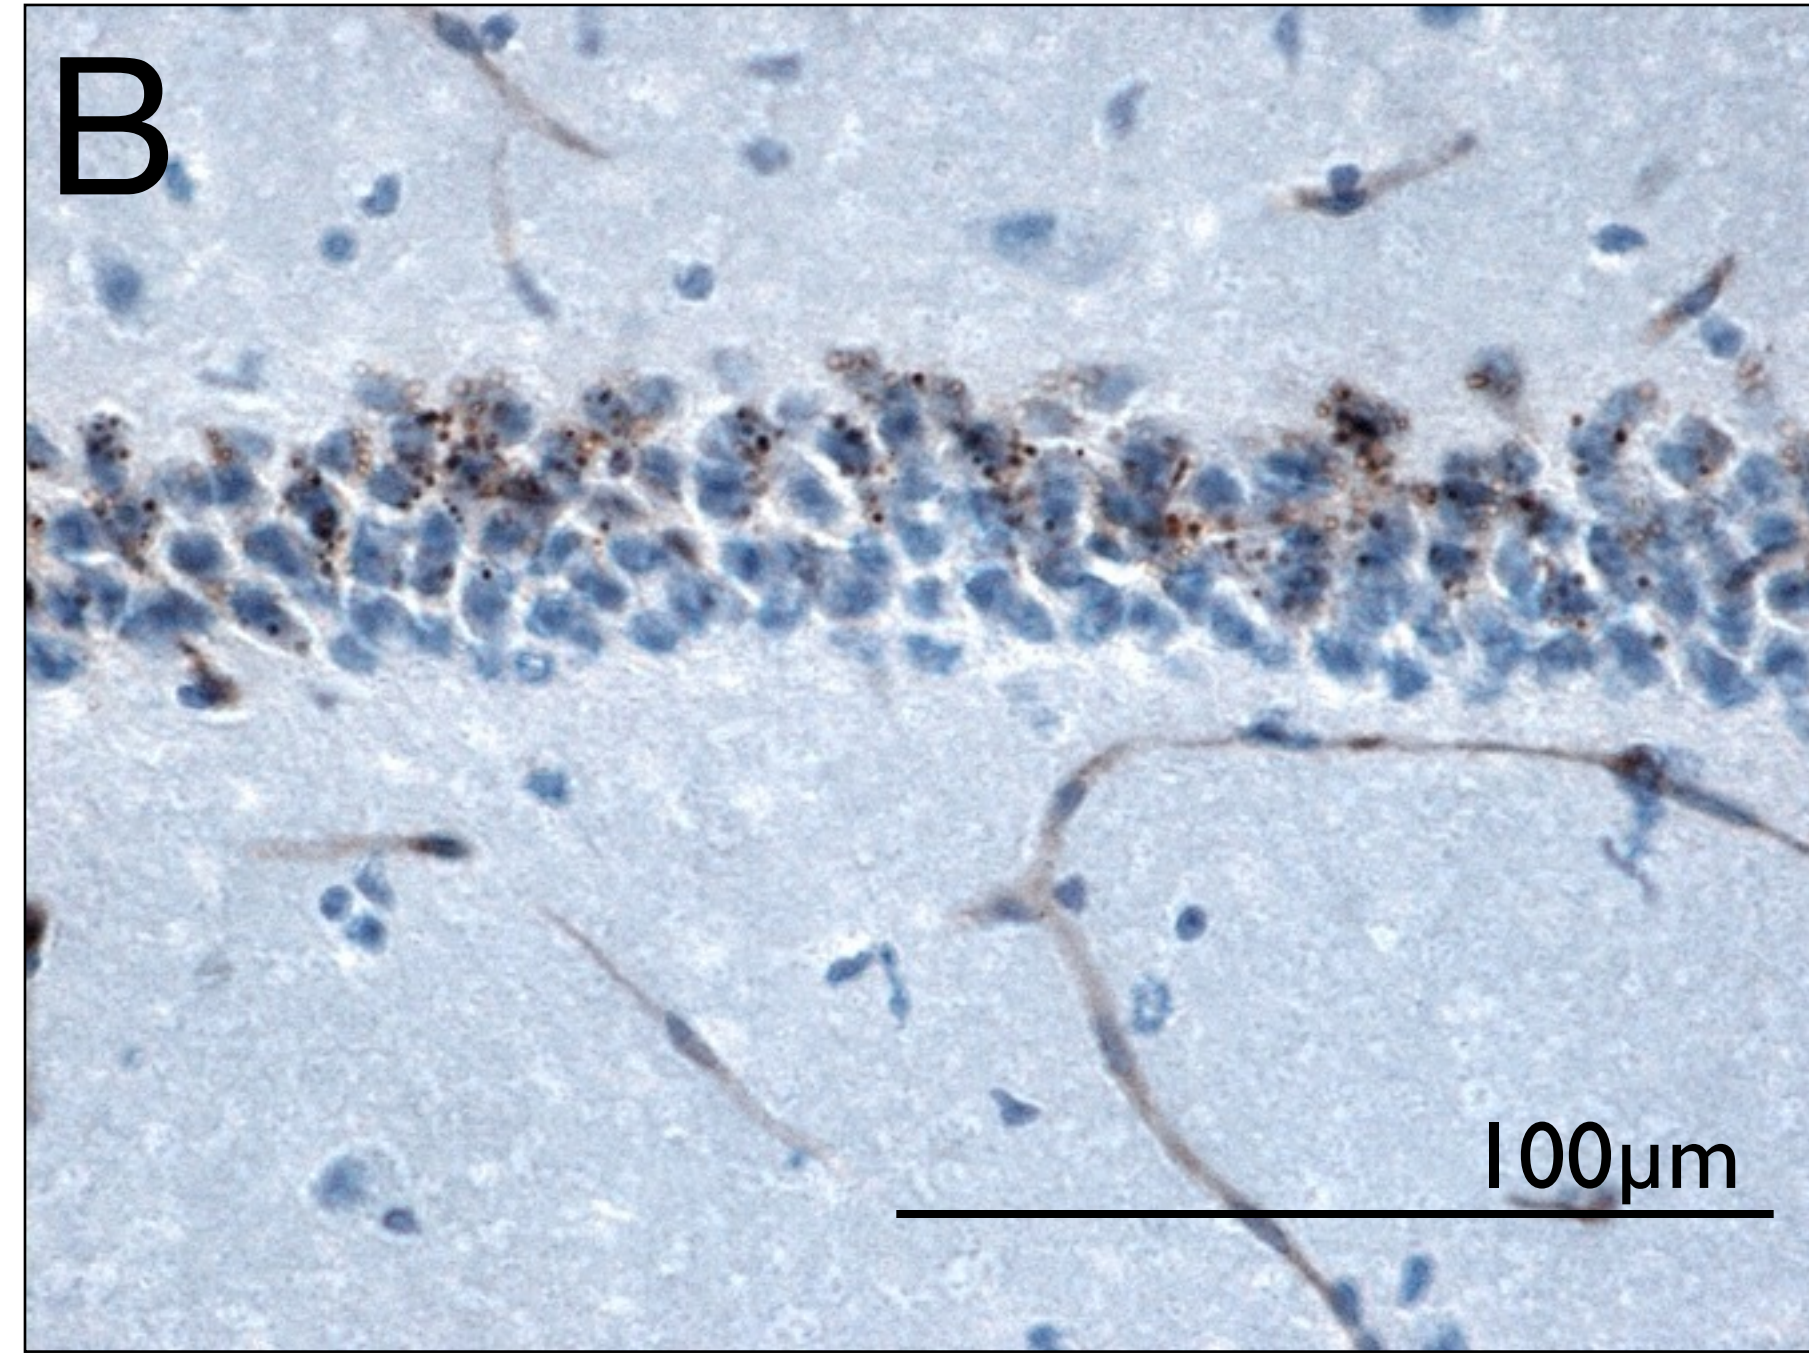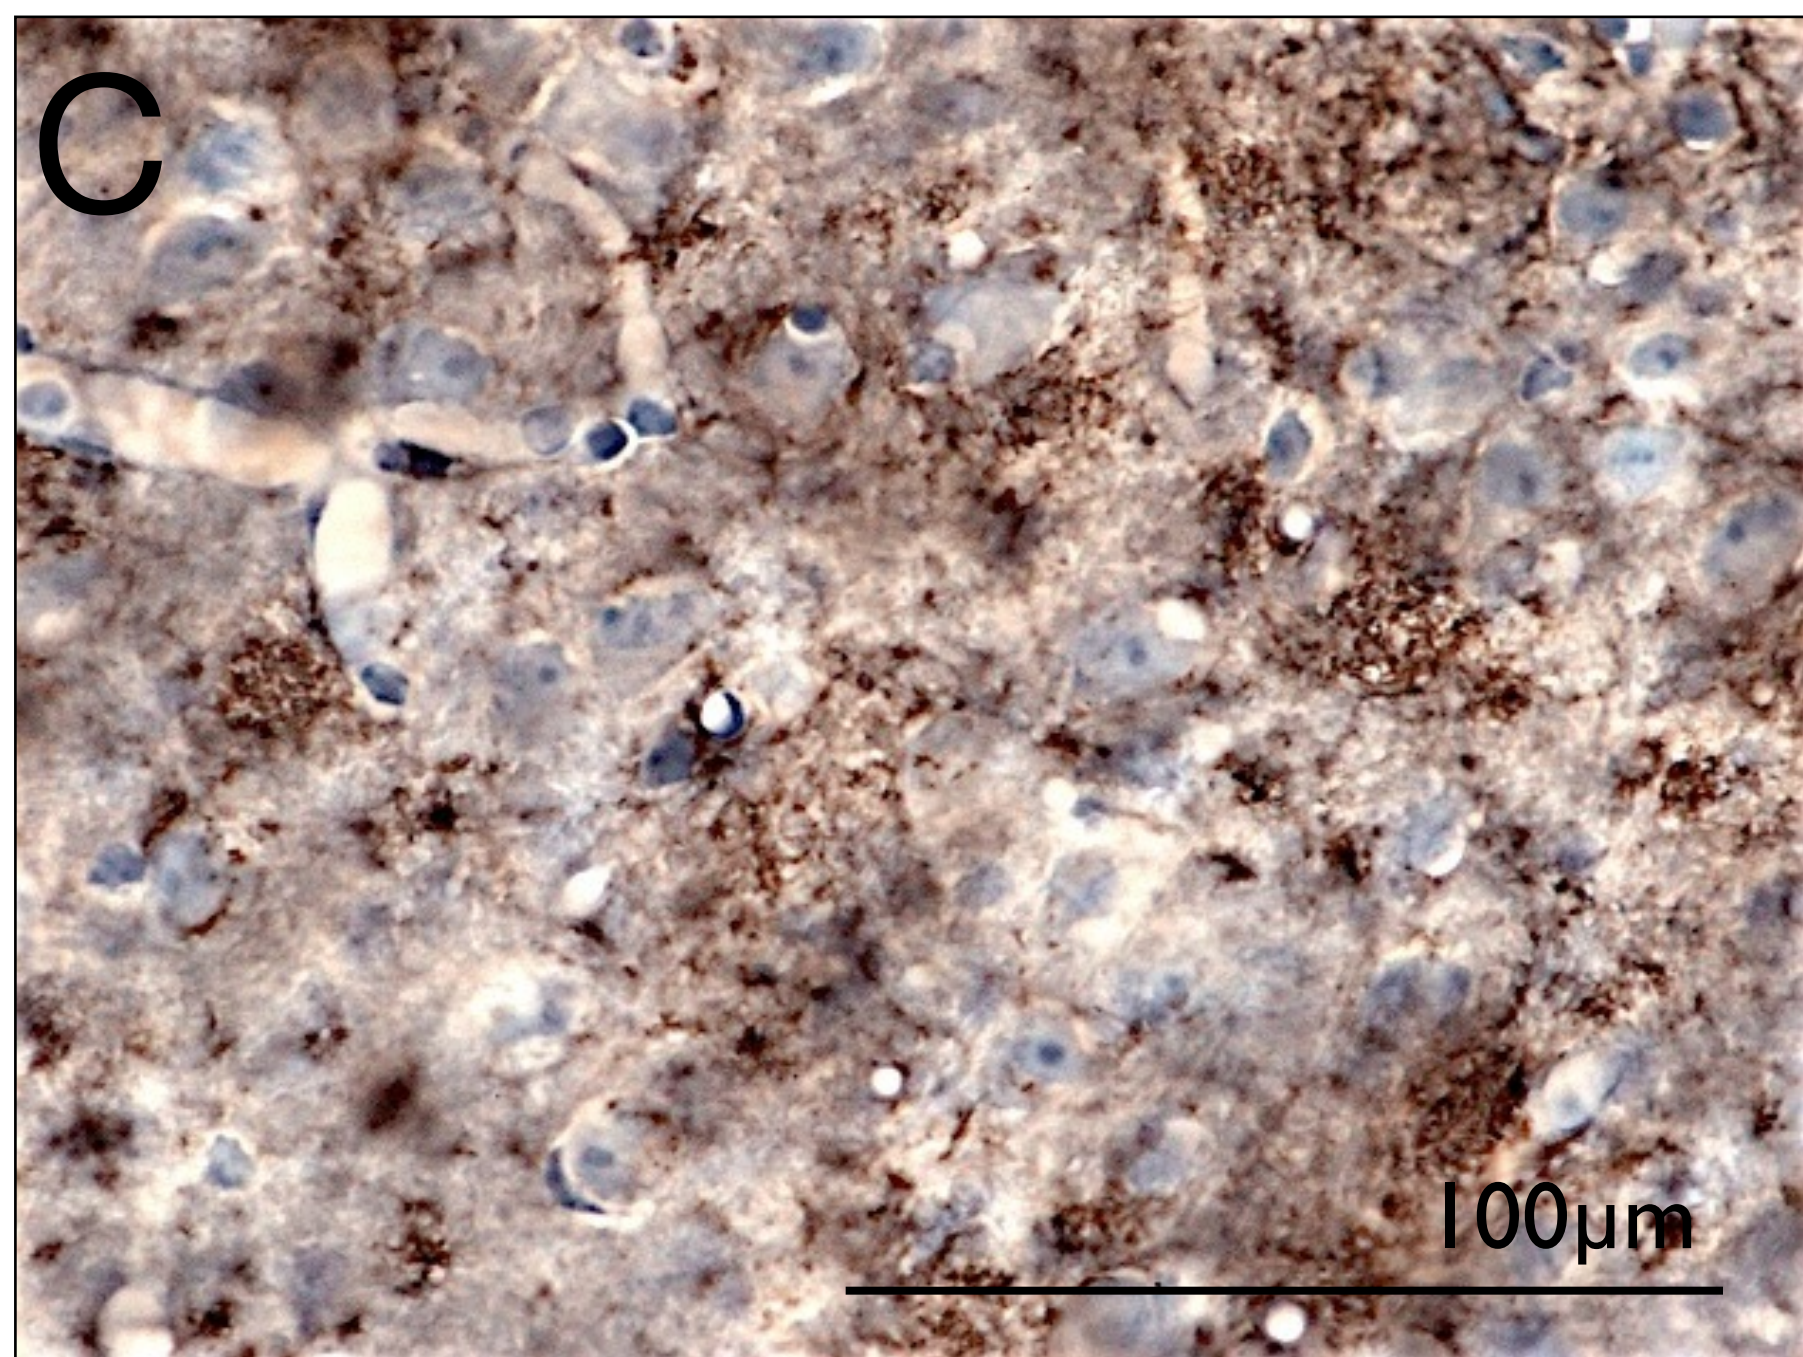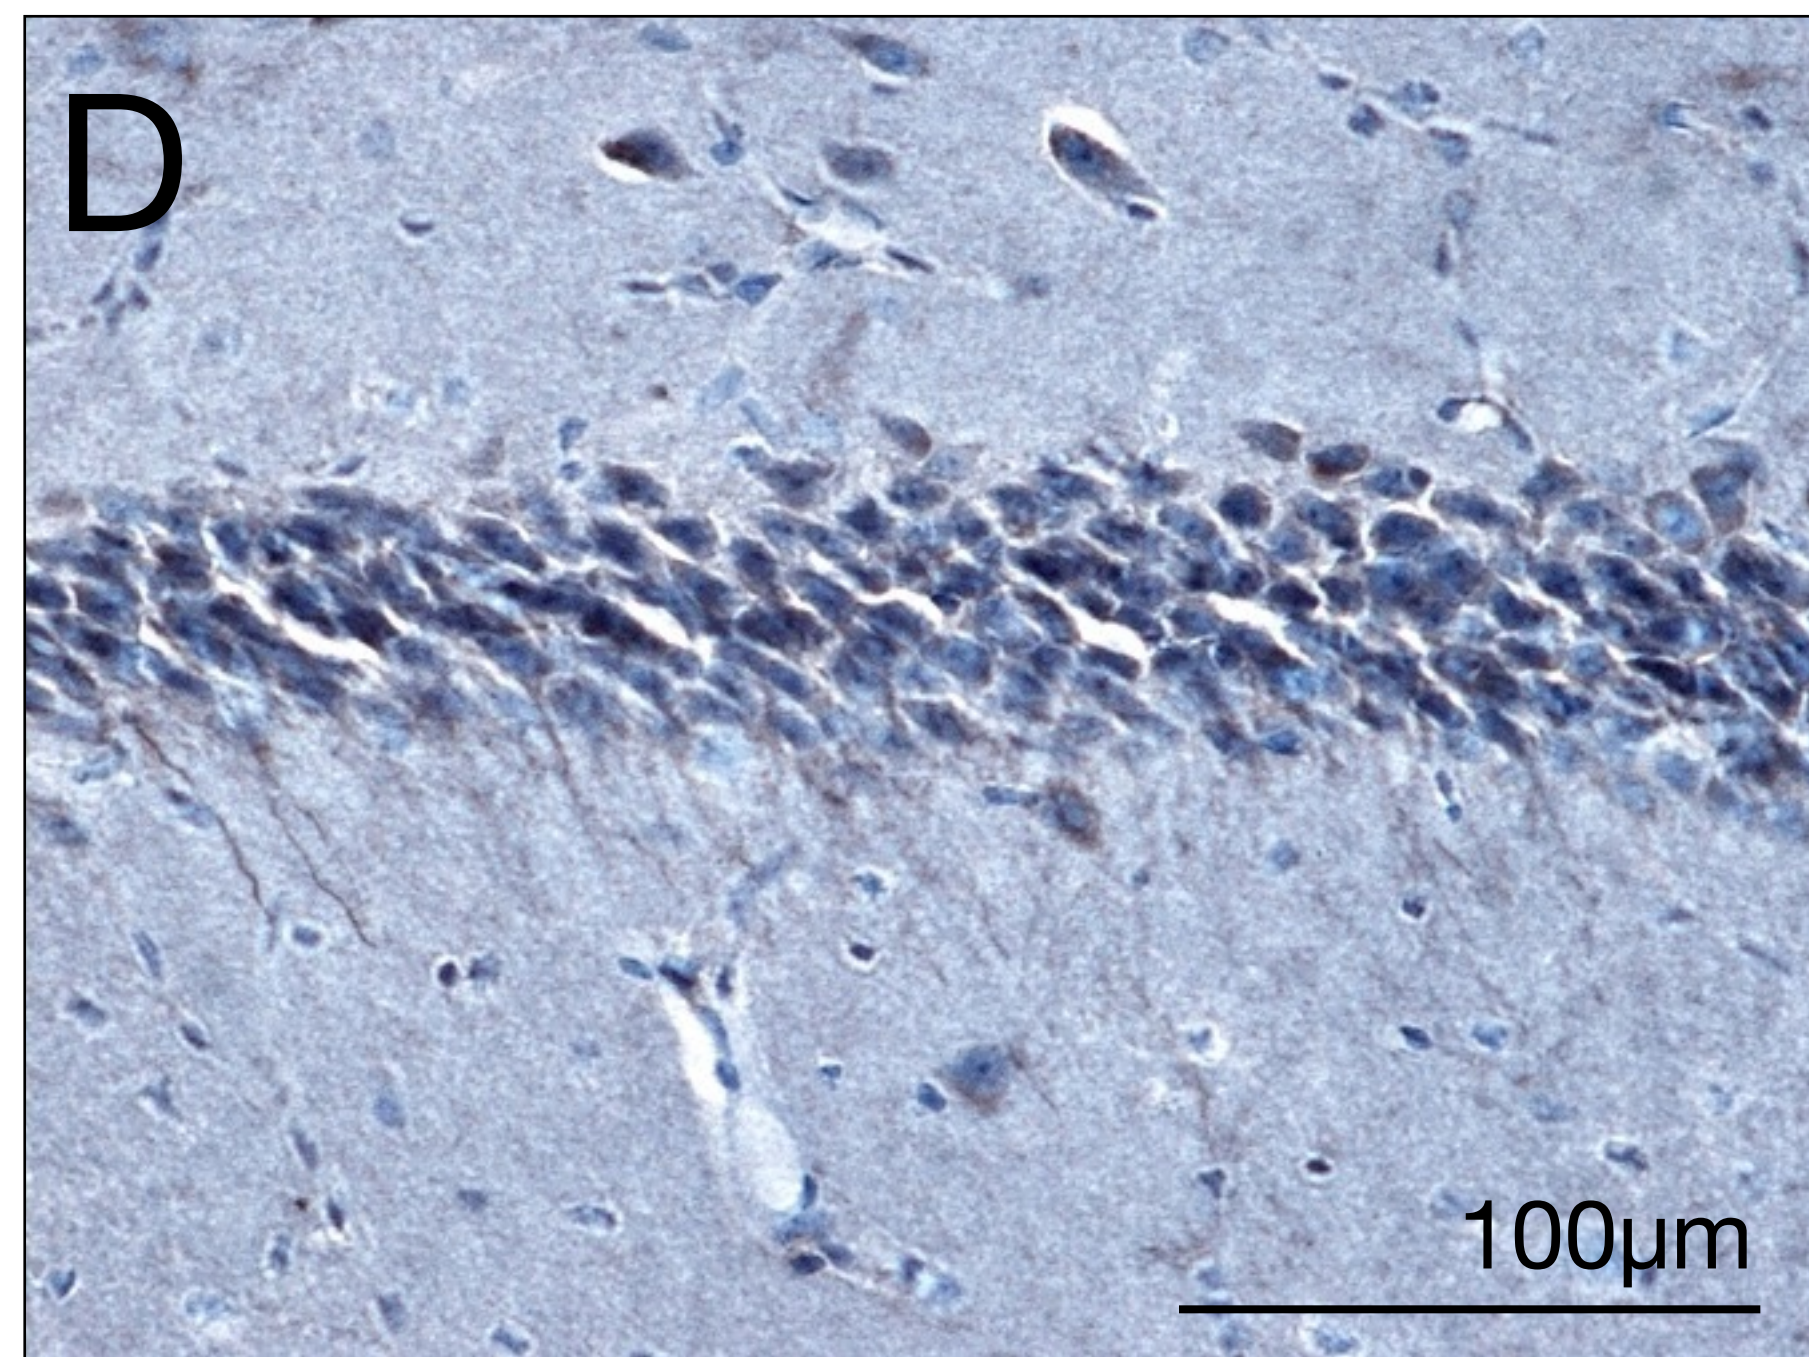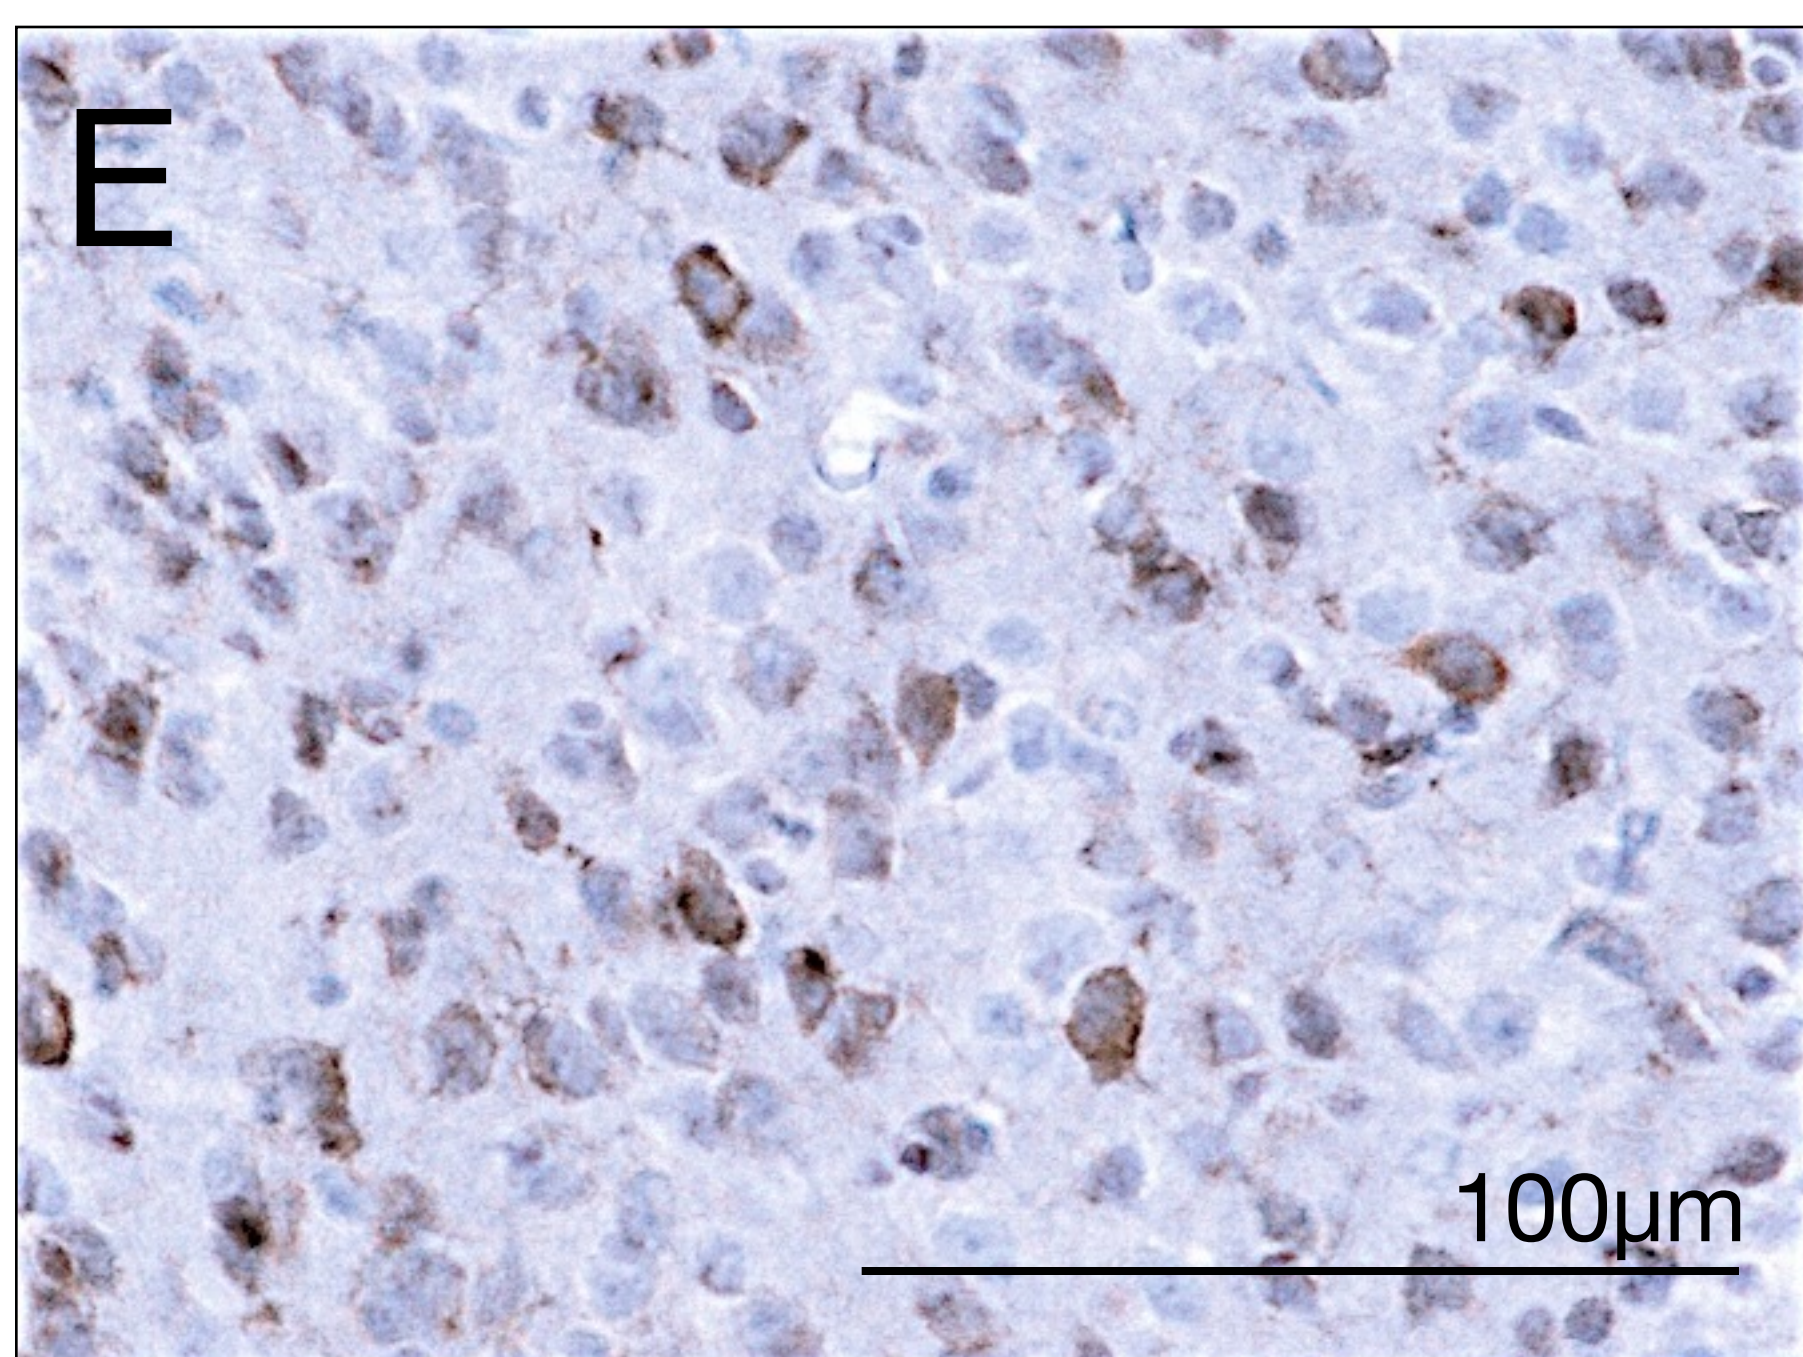

Supplement: 2051-5960-2-17-S1.pdf [file 2051-5960-2-17-S1.pdf]
