# Supplementary material for: Lesion of the subiculum reduces the spread of amyloid beta pathology to interconnected brain regions in a mouse model of Alzheimer’s disease
Source: PubMed Central journal article supplement (PMC3932948; doi:10.1186/2051-5960-2-17), 2014-02-11

6 months  
Dorsal subiculum

Lesioned

Intact

TG + Ibo

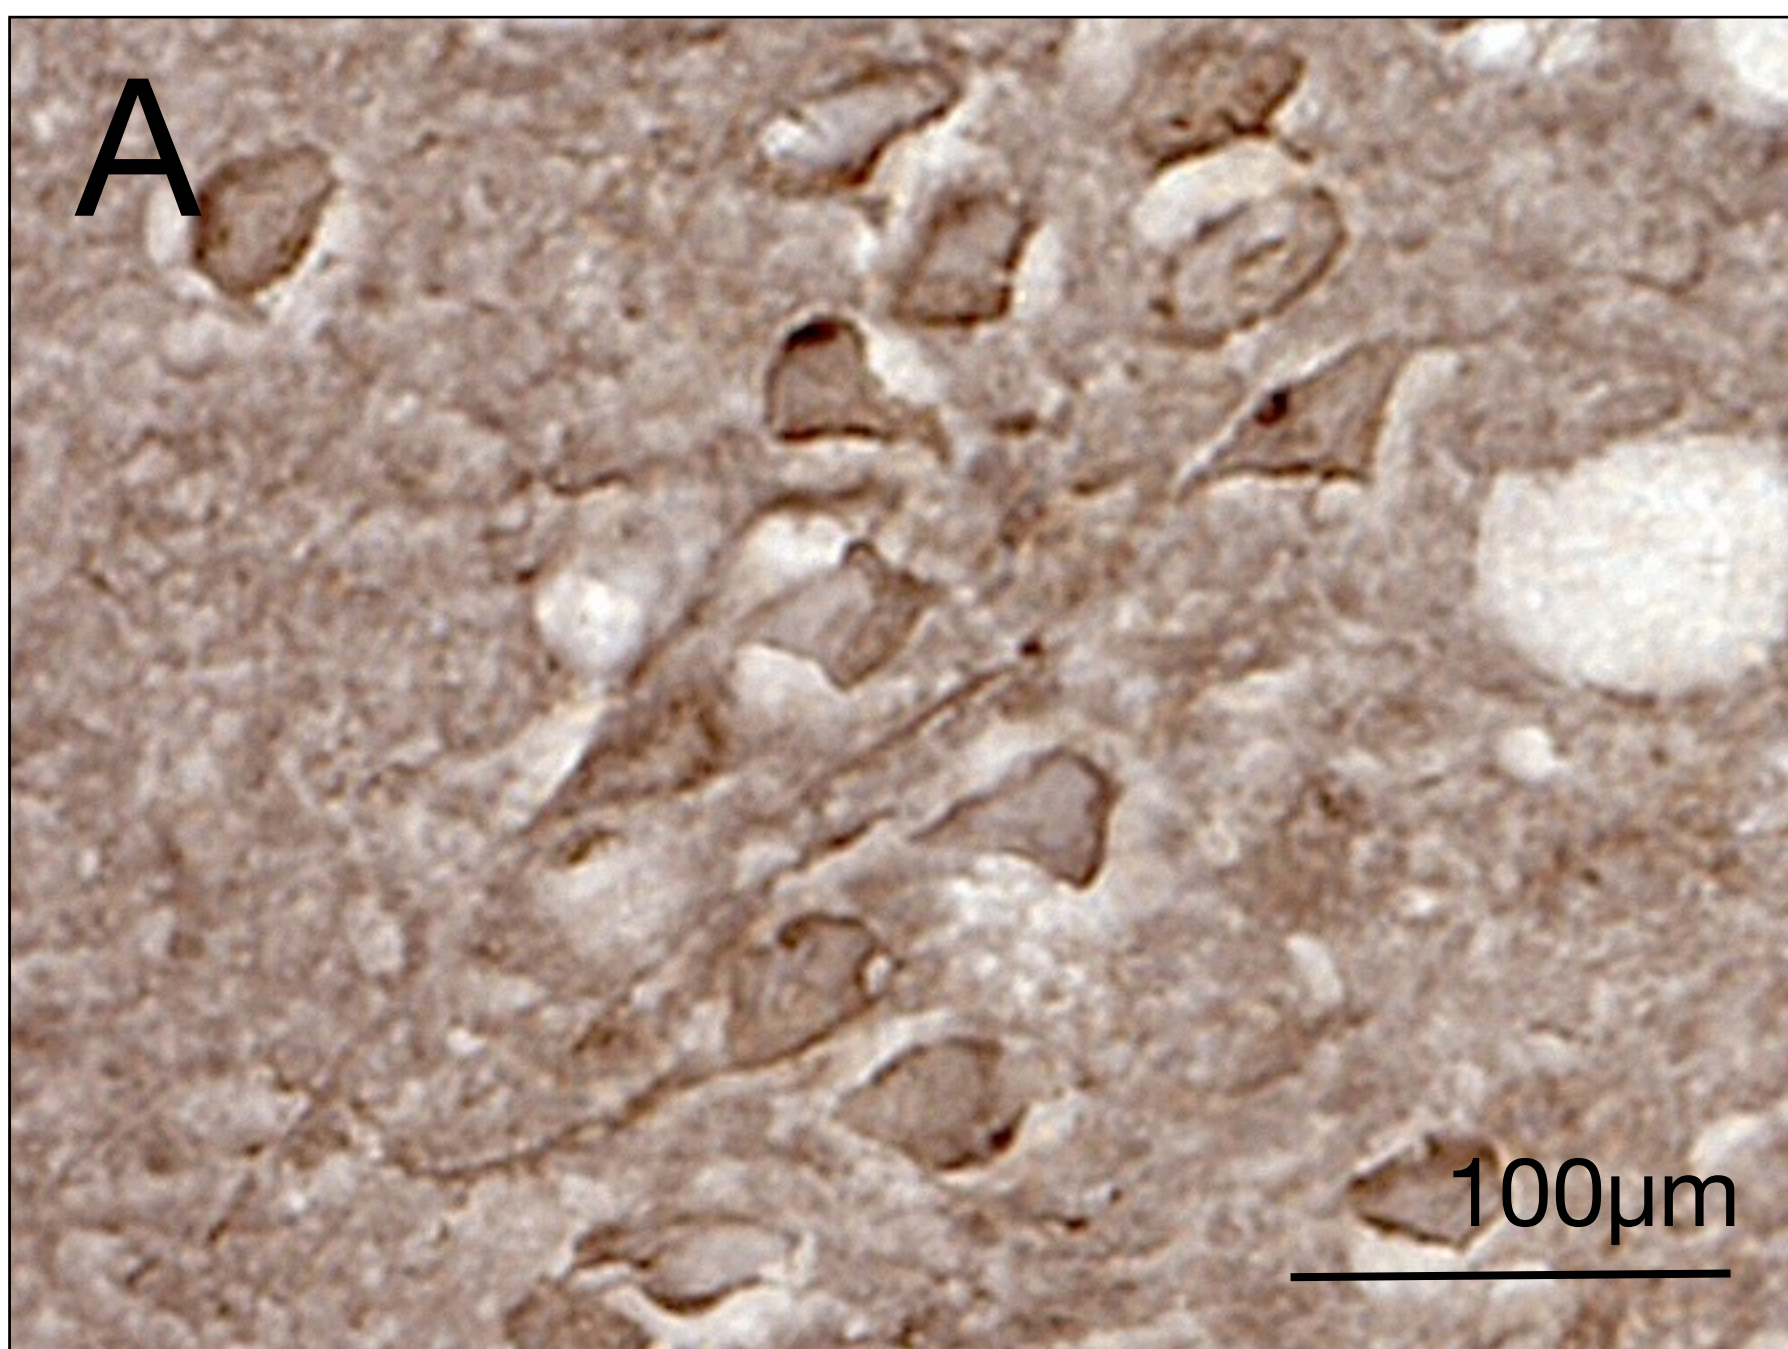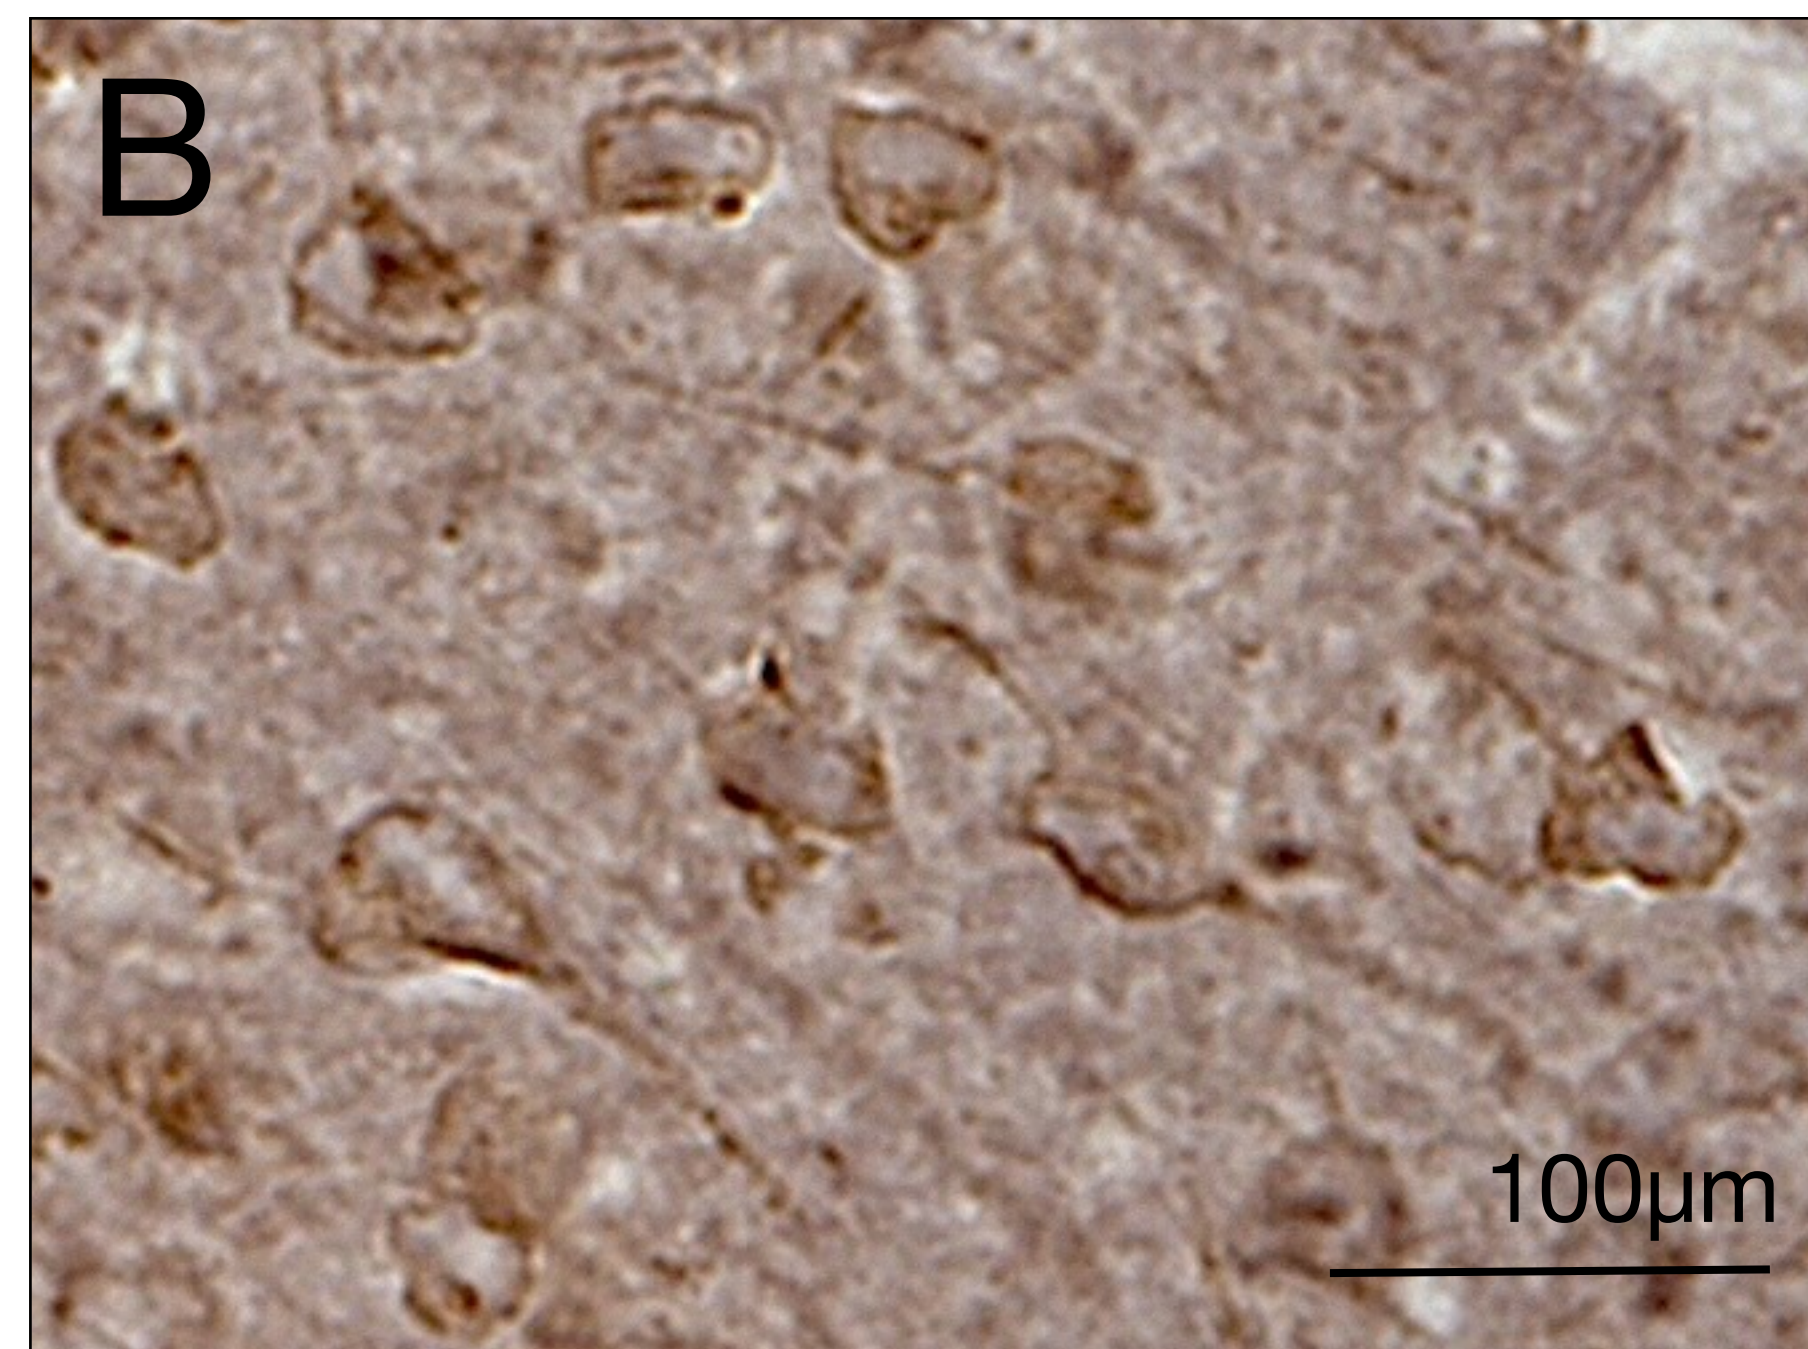

Supplement: 2051-5960-2-17-S2.pdf [file 2051-5960-2-17-S2.pdf]
